# Supplementary material for: A meta-analysis of weekly cisplatin versus three weekly cisplatin chemotherapy plus concurrent radiotherapy (CRT) for advanced head and neck cancer (HNC)
Source: PubMed Central journal article supplement (PMC5342545; doi:10.18632/oncotarget.11824), 2016-09-02
Supplement: oncotarget-07-70185-s001.pdf [file oncotarget-07-70185-s001.pdf]

# A meta-analysis of weekly cisplatin versus three weekly cisplatin chemotherapy plus concurrent radiotherapy (CRT) for advanced head and neck cancer (HNC)

## SUPPLEMENTARY FIGURES

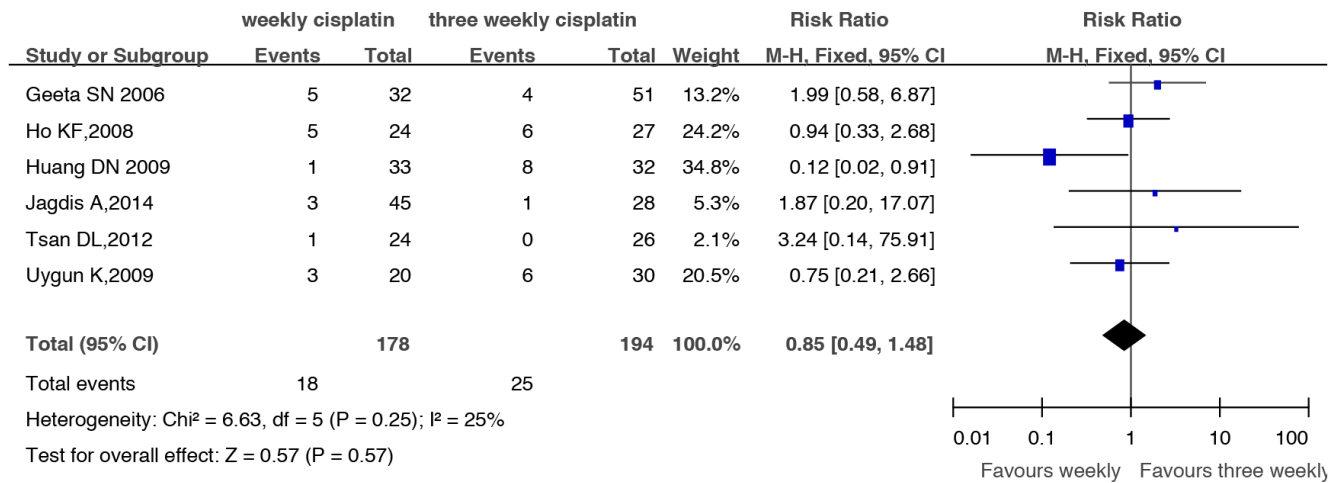

Supplementary Figure S1: Weekly versus three weekly cisplatin CRT with toxicity grade  $\geq 3$  neutropenia.

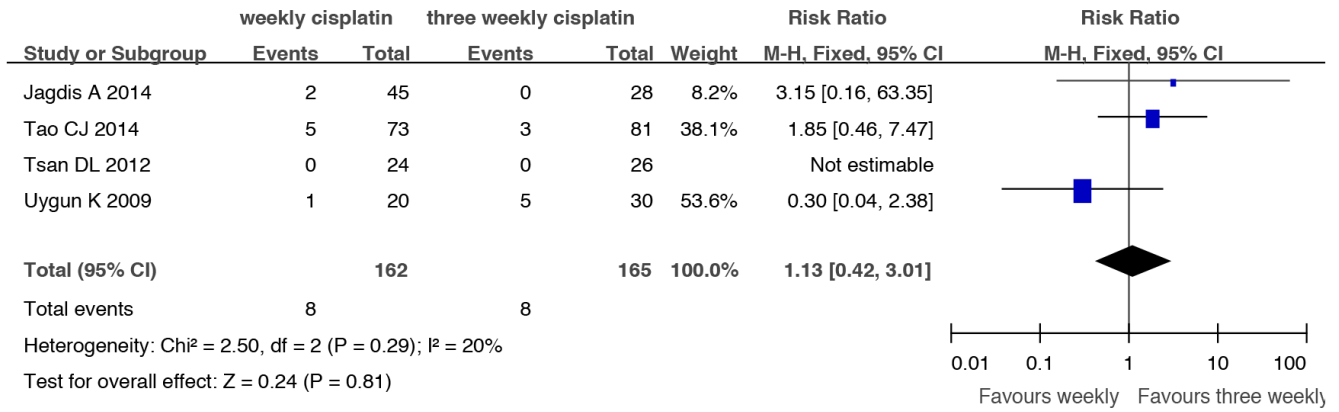

Supplementary Figure S2: Weekly versus three weekly cisplatin CRT with toxicity grade  $\geq 3$  thrombocytopenia.

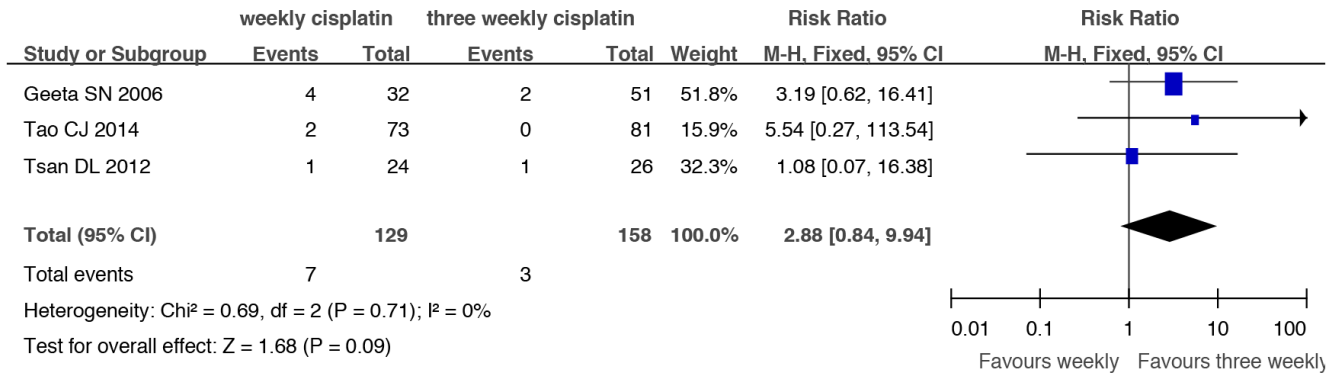

Supplementary Figure S3: Weekly versus three weekly cisplatin CRT with toxicity grade  $\geq 3$  anemia.

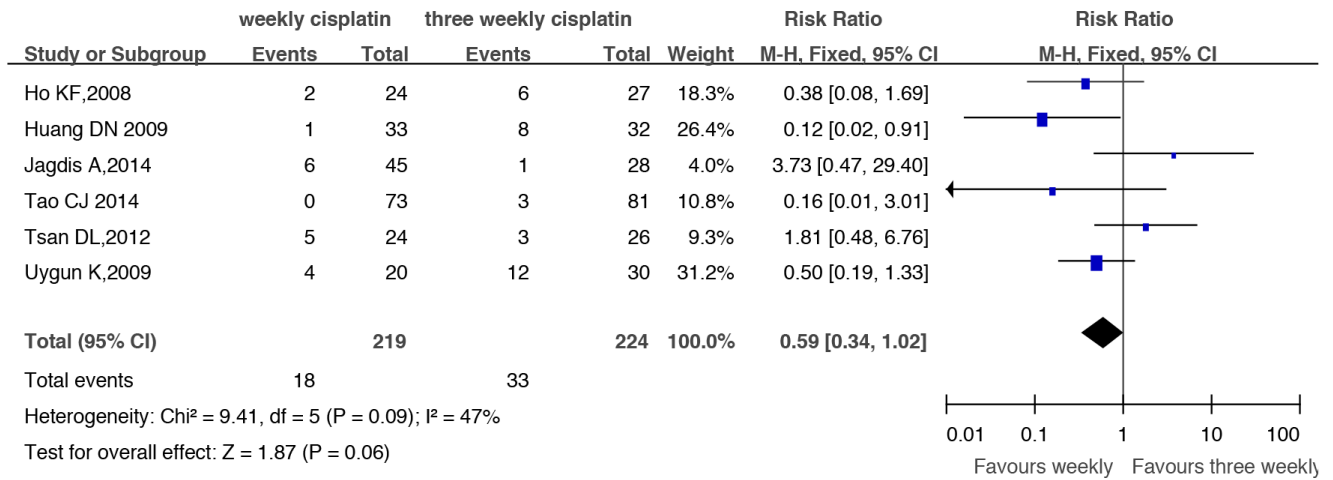

Supplementary Figure S4: Weekly versus three weekly cisplatin CRT with toxicity grade  $\geq 3$  nausea/vomiting.

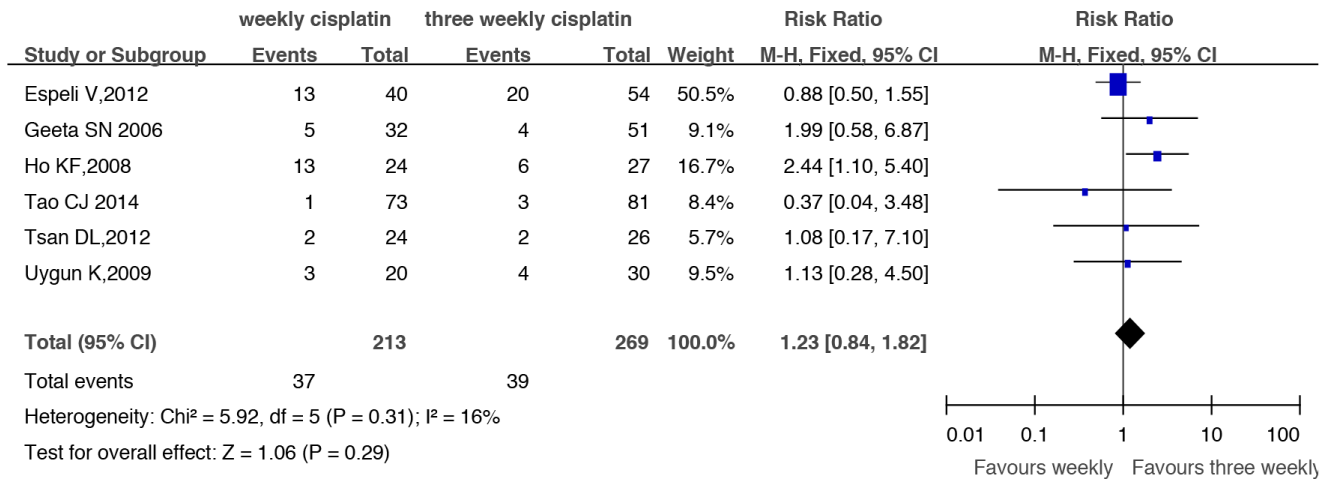

Supplementary Figure S5: Weekly versus three weekly cisplatin CRT with toxicity grade  $\geq 3$  dermatitis.

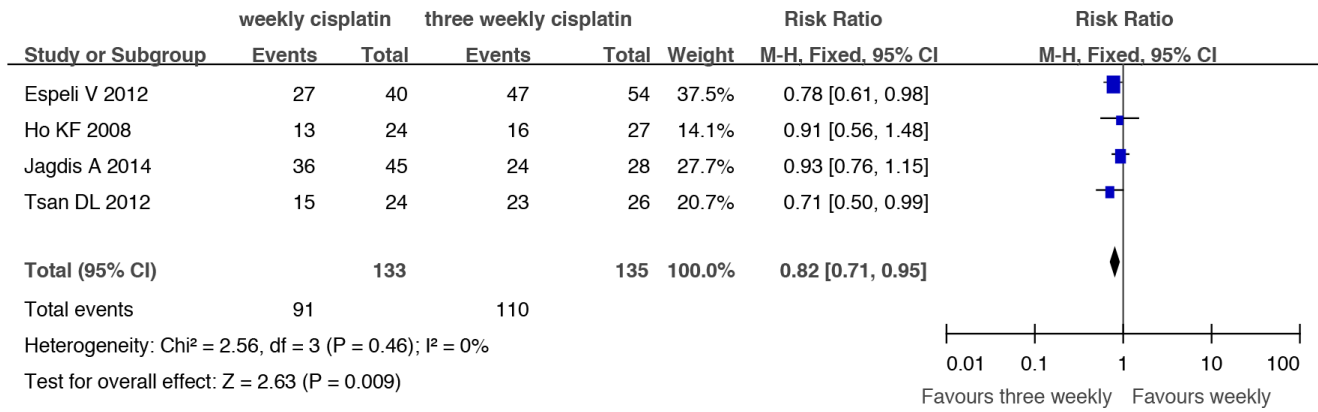

Supplementary Figure S6: Weekly versus three weekly cisplatin CRT in receiving cisplatin dose  $\geq 200\text{mg/m}^2$ .
